# Supplementary material
Source: PubMed Central journal article supplement (PMC4587300)
Supplement: NIHMS718069-supplement-3.pdf [file NIHMS718069-supplement-3.pdf]

| <b>Supplemental Data Table 1. Association between CD31 MVD and angiogenic gene expression</b> |                 |                     |                |                   |           |            |            |                     |                   |
|-----------------------------------------------------------------------------------------------|-----------------|---------------------|----------------|-------------------|-----------|------------|------------|---------------------|-------------------|
| <b>Gene symbol</b>                                                                            | <b>Probe ID</b> | <b>CD31 p-value</b> | <b>CD31Tau</b> | <b>OS p-value</b> | <b>HR</b> | <b>LCL</b> | <b>UCL</b> | <b>CD31 q-value</b> | <b>OS q-value</b> |
| SLC12A6                                                                                       | 220740_s_at     | 0.0002              | 0.40           | 0.19              | 2.72      | 0.74       | 10.05      | 0.04                | 0.20              |
| PIDD                                                                                          | 221640_s_at     | 0.002               | -0.32          | 0.48              | 0.67      | 0.31       | 1.43       | 0.26                | 0.33              |
| KDR                                                                                           | 203934_at       | 0.004               | 0.30           | 0.06              | 0.35      | 0.11       | 1.16       | 0.26                | 0.11              |
| IGF1                                                                                          | 209542_x_at     | 0.01                | 0.29           | 0.46              | 0.86      | 0.55       | 1.35       | 0.26                | 0.33              |
| IL1RL2                                                                                        | 208038_at       | 0.01                | -0.28          | 0.15              | 1.58      | 0.80       | 3.11       | 0.26                | 0.17              |
| TNFRSF14                                                                                      | 209354_at       | 0.01                | -0.28          | 0.80              | 0.82      | 0.49       | 1.34       | 0.26                | 0.44              |
| FLT3LG                                                                                        | 206980_s_at     | 0.01                | -0.28          | 0.45              | 2.36      | 0.41       | 13.68      | 0.26                | 0.32              |
| IGF1                                                                                          | 209541_at       | 0.01                | 0.28           | 0.24              | 0.83      | 0.62       | 1.11       | 0.26                | 0.23              |
| NOTCH4                                                                                        | 205247_at       | 0.01                | 0.28           | 0.15              | 2.29      | 0.63       | 8.33       | 0.26                | 0.17              |
| GPR18                                                                                         | 210279_at       | 0.01                | -0.27          | 0.11              | 0.29      | 0.04       | 2.25       | 0.27                | 0.15              |
| IGFBP2                                                                                        | 202718_at       | 0.01                | 0.26           | 0.08              | 1.29      | 0.96       | 1.73       | 0.32                | 0.13              |
| TMEM204                                                                                       | 219315_s_at     | 0.01                | 0.26           | 0.80              | 1.12      | 0.53       | 2.35       | 0.33                | 0.44              |
| IGF1                                                                                          | 209540_at       | 0.02                | 0.25           | 0.57              | 0.89      | 0.63       | 1.27       | 0.40                | 0.37              |
| IGF1                                                                                          | 211577_s_at     | 0.02                | 0.25           | 0.83              | 0.96      | 0.52       | 1.78       | 0.40                | 0.45              |
| CUL7                                                                                          | 36084_at        | 0.02                | 0.24           | 0.00              | 5.35      | 2.36       | 12.13      | 0.46                | 0.01              |
| ITGB3                                                                                         | 204625_s_at     | 0.03                | -0.23          | 0.03              | 2.24      | 0.87       | 5.78       | 0.48                | 0.08              |
| PECAM1                                                                                        | 208981_at       | 0.03                | 0.23           | 0.14              | 0.59      | 0.32       | 1.11       | 0.51                | 0.17              |
| CUL7                                                                                          | 203558_at       | 0.03                | 0.22           | 0.00              | 4.77      | 2.22       | 10.23      | 0.55                | 0.01              |
| SERPINB5                                                                                      | 204855_at       | 0.04                | 0.22           | 0.02              | 2.17      | 1.03       | 4.57       | 0.58                | 0.06              |
| TIMP2                                                                                         | 203167_at       | 0.04                | 0.21           | 0.99              | 1.02      | 0.58       | 1.81       | 0.58                | 0.50              |
| IL5RA                                                                                         | 211516_at       | 0.04                | 0.21           | 0.08              | 4.99      | 0.84       | 29.59      | 0.58                | 0.13              |
| PIDD                                                                                          | 219019_at       | 0.045               | -0.21          | 0.54              | 1.52      | 0.53       | 4.41       | 0.58                | 0.36              |
| COL4A1                                                                                        | 211980_at       | 0.048               | 0.21           | 0.43              | 0.79      | 0.51       | 1.24       | 0.60                | 0.31              |

†HR: Hazard Ratio; OS: Overall Survival; Q-value = adjusted P-value.
